# Supplementary material for: Ionothermal synthesis and crystal structures of novel aluminum phosphates with in situ generated templates
Source: Royal Society of Chemistry journal article supplement (doi:10.1039/c4dt03233k), 2014-12-11
Supplement: c4dt03233k1.pdf [file c4dt03233k1.pdf]

## Supplementary Information

# Ionothermal Synthesis and Crystal Structures of Novel Aluminum Phosphates with in Situ Generated Templates

Shanshan Man, Zenglong Wang, Boya Zhao, Lei Liu\* and Jinxiang Dong

Research Institute of Special Chemicals, Taiyuan University of Technology, Taiyuan,  
China

[liulei@tyut.edu.cn](mailto:liulei@tyut.edu.cn)

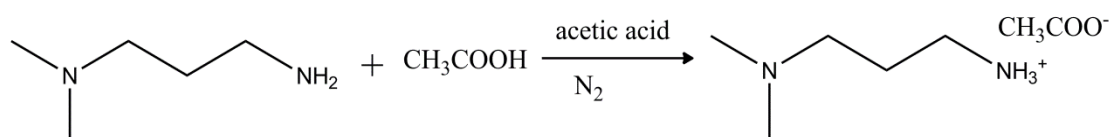

**Scheme S1** synthetic route of (HDMAPA)(Ac)

Table S1 Synthesis details and conditions for the preparation of materials

| Entry | Mass of reagents added (g) (molar ratio of reagents) |                                |            |             | Tem.(°C) | Time (h) | Product   |
|-------|------------------------------------------------------|--------------------------------|------------|-------------|----------|----------|-----------|
|       | Al(OH) <sub>3</sub>                                  | H <sub>3</sub> PO <sub>4</sub> | PILs       | HF          |          |          |           |
| 1     | 0.078(1.0)                                           | 0.057 (0.5)                    | 1.62(10.0) | 0           | 180      | 72       | amorphous |
| 2     | 0.078(1.0)                                           | 0.113 (1.0)                    | 1.62(10.0) | 0           | 180      | 72       | amorphous |
| 3     | 0.078(1.0)                                           | 0.226 (2.0)                    | 1.62(10.0) | 0           | 180      | 72       | AIPO-PIL1 |
| 4     | 0.078(1.0)                                           | 0.339 (3.0)                    | 1.62(10.0) | 0           | 180      | 72       | AIPO-PIL1 |
| 5     | 0.078(1.0)                                           | 0.452 (4.0)                    | 1.62(10.0) | 0           | 180      | 72       | AIPO-PIL1 |
| 6     | 0.078(1.0)                                           | 0.576 (5.0)                    | 1.62(10.0) | 0           | 180      | 72       | AIPO-PIL1 |
| 7     | 0.078(1.0)                                           | 0.692 (6.0)                    | 1.62(10.0) | 0           | 180      | 72       | AIPO-PIL1 |
| 8     | 0.078(1.0)                                           | 0.791 (7.0)                    | 1.62(10.0) | 0           | 180      | 72       | AIPO-PIL1 |
| 9     | 0.078(1.0)                                           | 0.057 (0.5)                    | 1.62(10.0) | 0.104 (0.5) | 180      | 72       | amorphous |
| 10    | 0.078(1.0)                                           | 0.113 (1.0)                    | 1.62(10.0) | 0.104 (0.5) | 180      | 72       | AIPO-PIL2 |
| 11    | 0.078(1.0)                                           | 0.226 (2.0)                    | 1.62(10.0) | 0.104 (0.5) | 180      | 72       | AIPO-PIL2 |
| 12    | 0.078(1.0)                                           | 0.339 (3.0)                    | 1.62(10.0) | 0.104 (0.5) | 180      | 72       | AIPO-PIL2 |
| 13    | 0.078(1.0)                                           | 0.452 (4.0)                    | 1.62(10.0) | 0.104 (0.5) | 180      | 72       | amorphous |

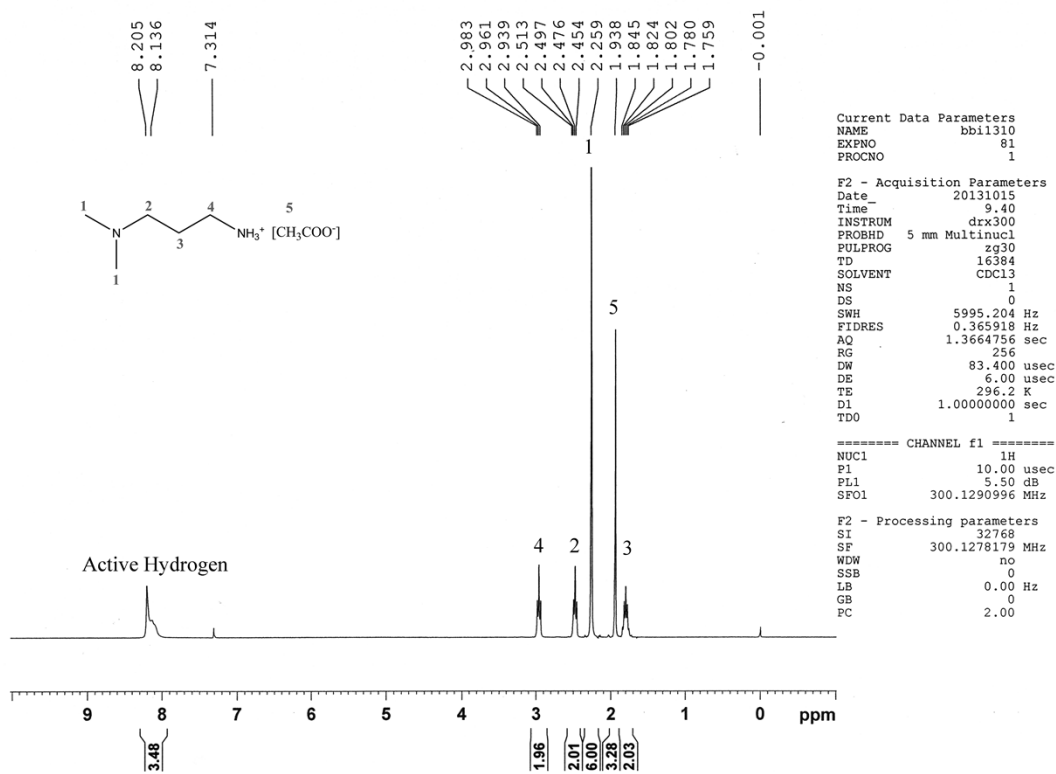

Figure S1 <sup>1</sup>H-NMR spectrum of (HDMAPA)(Ac)

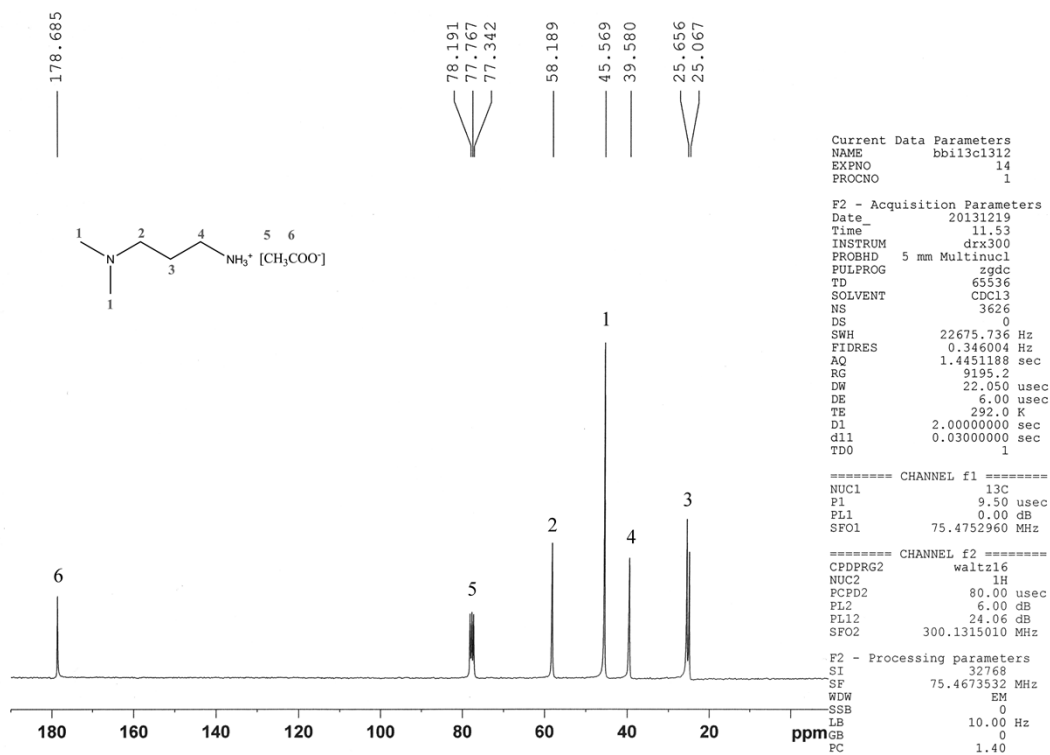

Figure S2 <sup>13</sup>C-NMR spectrum of (HDMAPA)(Ac)

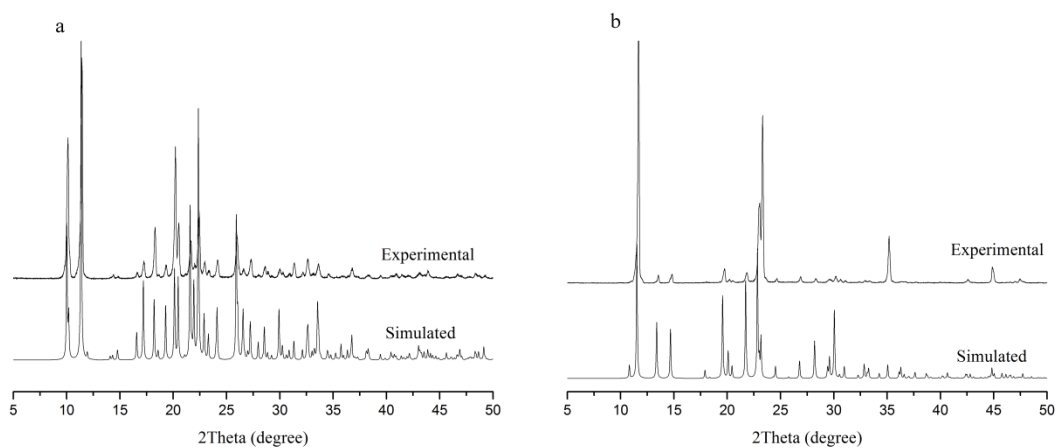

**Figure S3** Simulated and experimental powder XRD patterns of AlPO-PIL1 (a) and AlPO-PIL2 (b)

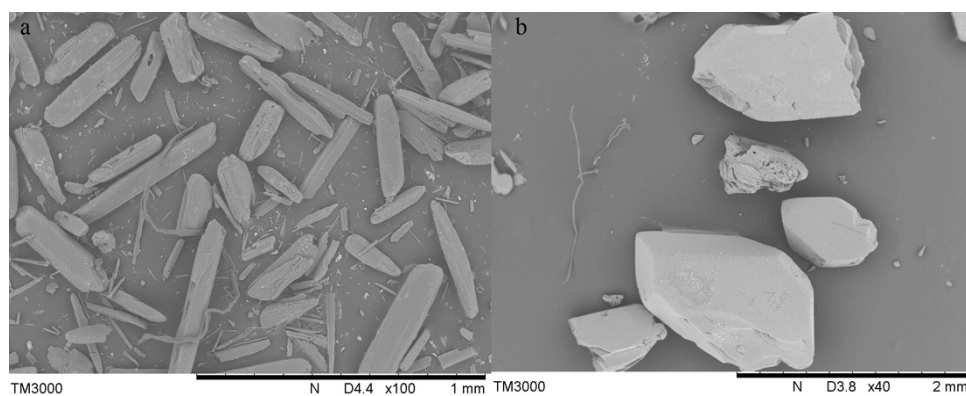

**Figure S4** SEM images of AlPO-PIL1 (a) and AlPO-PIL2 (b)

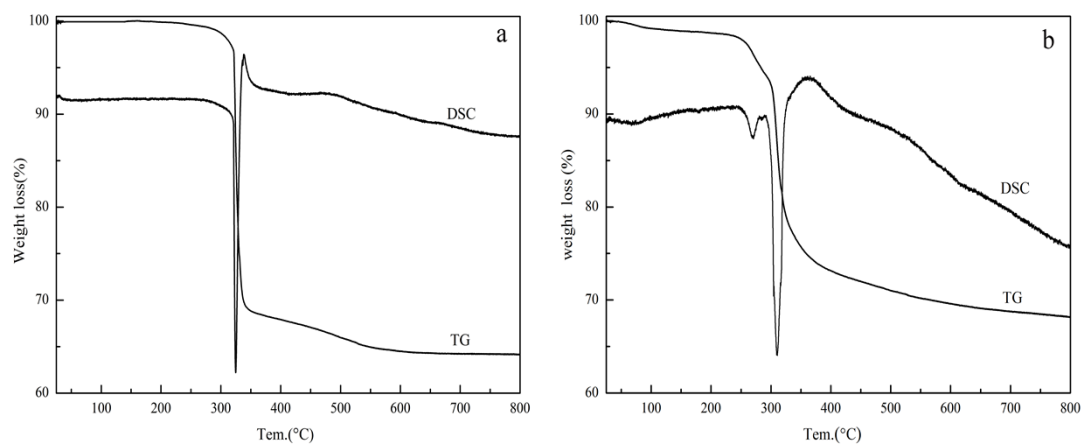

**Figure S5** TG-DSC curves of AlPO-PIL1 (a) and AlPO-PIL2 (b)

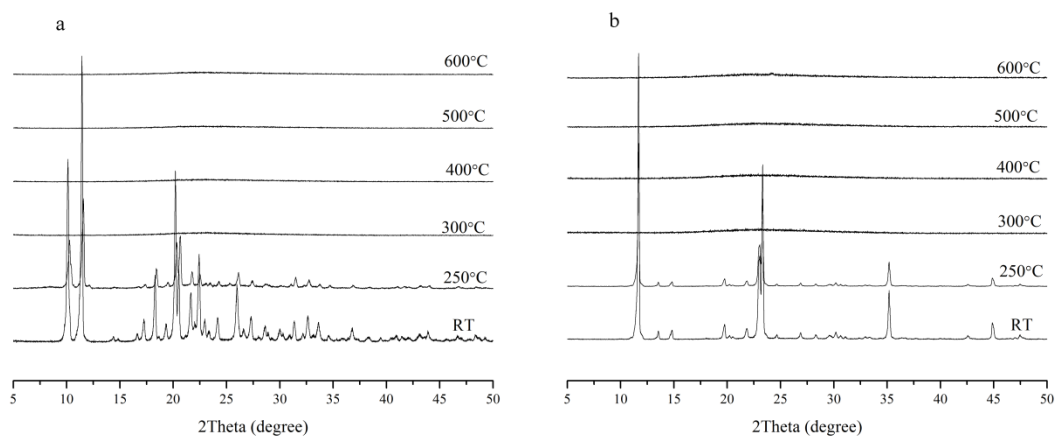

**Figure S6** Powder XRD patterns of the two materials after heat treatment in air at different temperatures: AlPO-PIL1 (a) and AlPO-PIL2 (b).

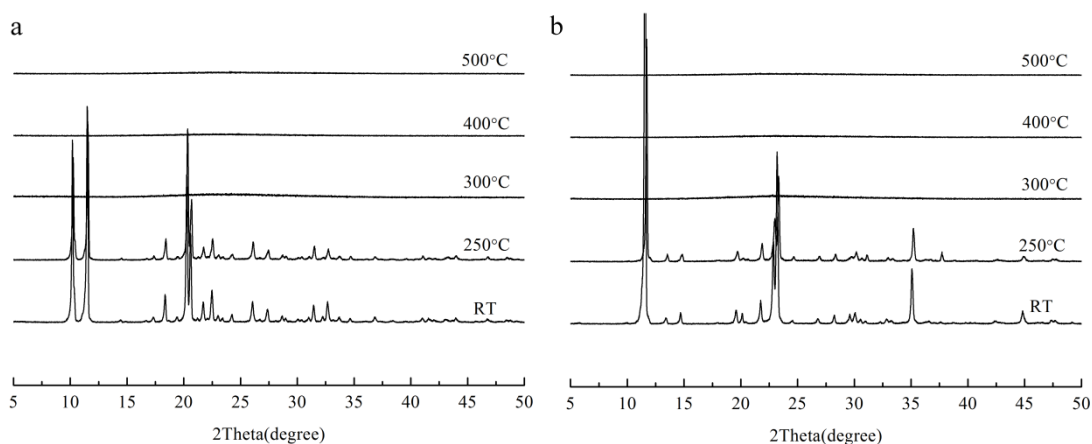

**Figure S7** Powder XRD patterns of the two materials after heat treatment in  $N_2$  atmosphere at different temperatures: AlPO-PIL1 (a) and AlPO-PIL2 (b).

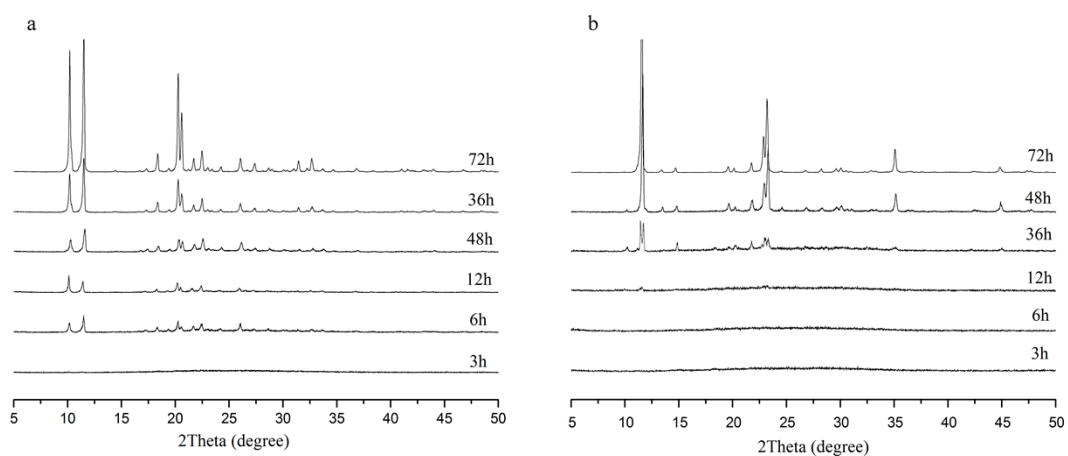

**Figure S8** Powder XRD patterns illustrating the structure evolution of the two aluminophosphates AlPO-PIL1 (a) and AlPO-PIL2 (b)
